# Supplementary material for: Transition from collision to subduction in Western Greece: the Katouna–Stamna active fault system and regional kinematics
Source: Springer Nature journal article supplement (doi:10.1007/s00531-016-1345-9), 2016-06-29
Supplement: MOESM2 [file 531_2016_1345_MOESM2_ESM.pdf]

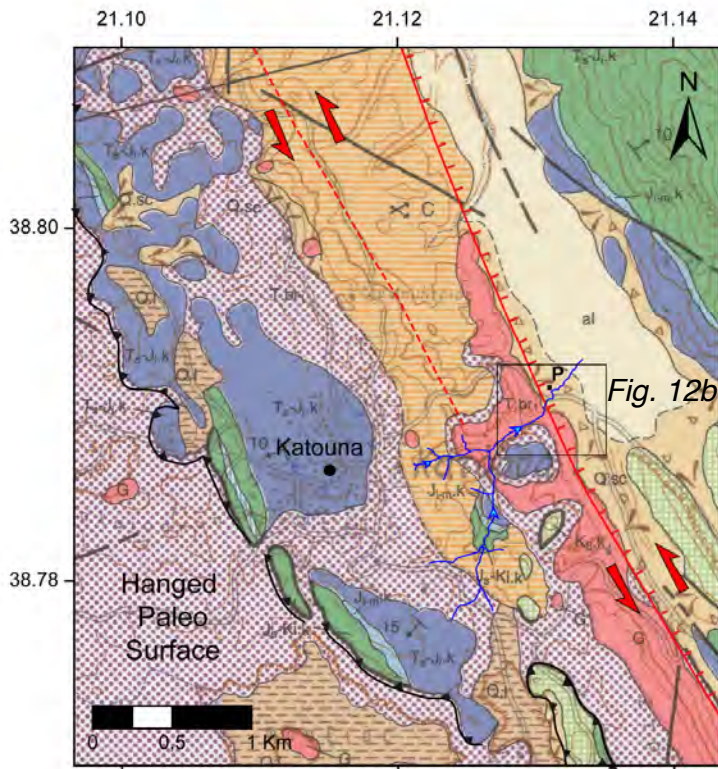

| QATERNARY HOLOCENE    |                                                                                                                                                                                                                                                                                                                                                                                                                                                                                    |
|-----------------------|------------------------------------------------------------------------------------------------------------------------------------------------------------------------------------------------------------------------------------------------------------------------------------------------------------------------------------------------------------------------------------------------------------------------------------------------------------------------------------|
|                       | Alluvial deposits.                                                                                                                                                                                                                                                                                                                                                                                                                                                                 |
|                       | Scree, old and new talus cones and weathering material from the adjacent rocks.                                                                                                                                                                                                                                                                                                                                                                                                    |
|                       | Terra rossa.                                                                                                                                                                                                                                                                                                                                                                                                                                                                       |
| PLIO-PLEISTOCENE      |                                                                                                                                                                                                                                                                                                                                                                                                                                                                                    |
|                       | Clayey-pelites of various colours, unbedded. Marls clastic, of various colours, thin-bedded or unbedded, locally with small lenticular bodies of lignite and breccio-conglomerates. In the margins of the basin occur polymictic, various sizes, unconsolidated and locally graded breccio-conglomerates.                                                                                                                                                                          |
| IONIAN ZONE OLIGOCENE |                                                                                                                                                                                                                                                                                                                                                                                                                                                                                    |
|                       | Flysch: consisting of: a) in the upper members regular rhythmic or non-rhythmic alternations of thin-bedded sandstones with thin clayey-pelitte beds: Thickness: approximately 350 m. b) in the lower members unbedded, grey marly-clayey-pelites and rhythmic or non-rhythmic alternations of grey, light blue, thin-medium-bedded marl-clay-pelites with brownish, medium-thick-bedded, medium-coarse-grained and locally brecciated sandstones. Thickness: approximately 400 m. |
| EOCENE                |                                                                                                                                                                                                                                                                                                                                                                                                                                                                                    |
|                       | Limestones: whitish, fine-grained, platy with intercalations, lenses or other irregular bodies of cherts. Locally the limestones are grey, medium-thick-bedded granular and brecciated. Thickness: 100-350 m.                                                                                                                                                                                                                                                                      |
| PALEOCENE             |                                                                                                                                                                                                                                                                                                                                                                                                                                                                                    |
|                       | Limestones: usually whitish, though sometimes of various colours, platy, fine-grained or medium-coarse-grained. Locally massive, coarse-grained, brecciated with numerous fragments of macrofossils. Thickness: 50-300 m.                                                                                                                                                                                                                                                          |

| SENONIAN                     |                                                                                                                                                                                                                                                                                                                        |
|------------------------------|------------------------------------------------------------------------------------------------------------------------------------------------------------------------------------------------------------------------------------------------------------------------------------------------------------------------|
|                              | Limestones: whitish, occasionally platy, fine-grained and occasionally medium-thick-bedded, medium-coarse-grained and unbedded, brecciated. Thickness: 50-400 m.                                                                                                                                                       |
| UPPER ALBIAN - TURONIAN      |                                                                                                                                                                                                                                                                                                                        |
|                              | Cherts, limestones, marls and shales: reddish or of various colours, thin-medium-bedded, in regular rhythmic or non-rhythmic alternations. Locally occur massive, compact or loose and weathered terra rossa containing phosphate materials. Thickness: 0-100 m.                                                       |
| MALM-ALBIAN                  |                                                                                                                                                                                                                                                                                                                        |
|                              | Vugli limestones: of various colours, platy, fine-grained, occasionally massive and brecciated with intercalations, lenses and other irregular bodies of cherts. Often the platy limestones alternate rhythmically with very thin beds of schistose marls of various colours and clayey-pelites. Thickness: 100-350 m. |
| DOGGER                       |                                                                                                                                                                                                                                                                                                                        |
|                              | Siliceous schists: cherts of various colours, thin-bedded, alternating rhythmically with thin layers of schistose clayey-pelites of various colours. Locally the cherts are nodular and occur dispersed and sinked into massive clayey pelites of yellow-green colour. Thickness: 0-50 m.                              |
| UPPER LIAS (TOARCIAN)        |                                                                                                                                                                                                                                                                                                                        |
|                              | -Ammonite Rosso-: limestones reddish, yellowish, finegrained, platy, partly massive, nodular, brecciated and locally marly. Thickness: 0-50 m.                                                                                                                                                                         |
| UPPER TRIASSIC - LIAS        |                                                                                                                                                                                                                                                                                                                        |
|                              | Pantocrator limestones: limestones, locally dolomitic limestones whitish, to grey, silky, fine-medium-grained, partly coarse-grained, medium-thick-bedded, massive and brecciated. Thickness: 50-300 m.                                                                                                                |
| UPPER TRIASSIC - LOWEST LIAS |                                                                                                                                                                                                                                                                                                                        |
|                              | Tryphos formation: breccio-conglomerates carbonaceous, polymictic, of various sizes, mostly cohesive and locally unconsolidated. Thickness: 10-200 m.                                                                                                                                                                  |
| TRIASSIC                     |                                                                                                                                                                                                                                                                                                                        |
|                              | Evaporites: gypsum, black-grey, whitish, compact, massive, partly weathered and altered anhydrites whitish, dark, compact and massive. Thickness: more than 150 m.                                                                                                                                                     |
